# Supplementary material
Source: PubMed Central journal article supplement (PMC5659994)
Supplement: BPH-174-4032-s001.pdf [file BPH-174-4032-s001.pdf]

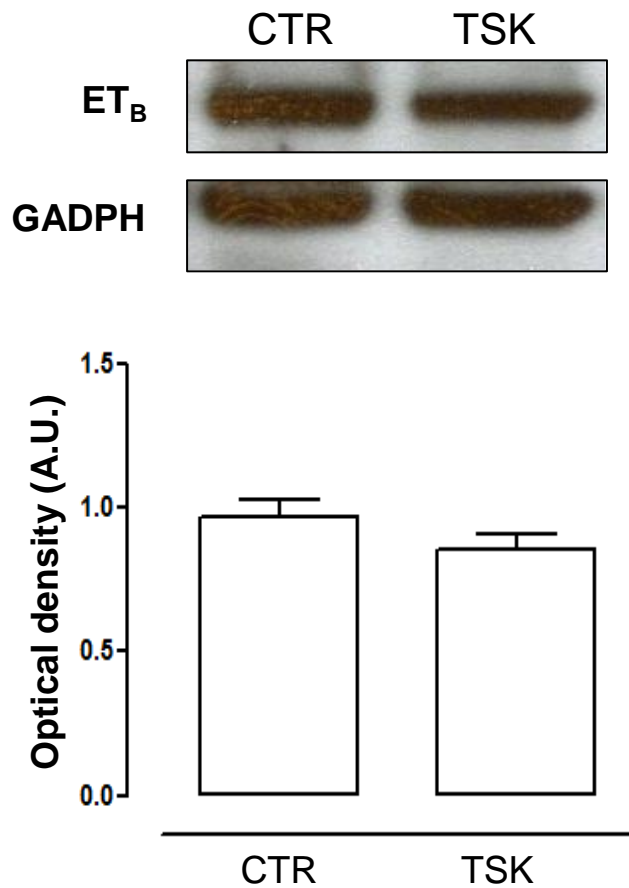

**Supplemental figure 1**

Western blot and densitometry analysis for  $ET_B$  expression in Tsk compared with control mice. Images are representative of 6 separate experiments.

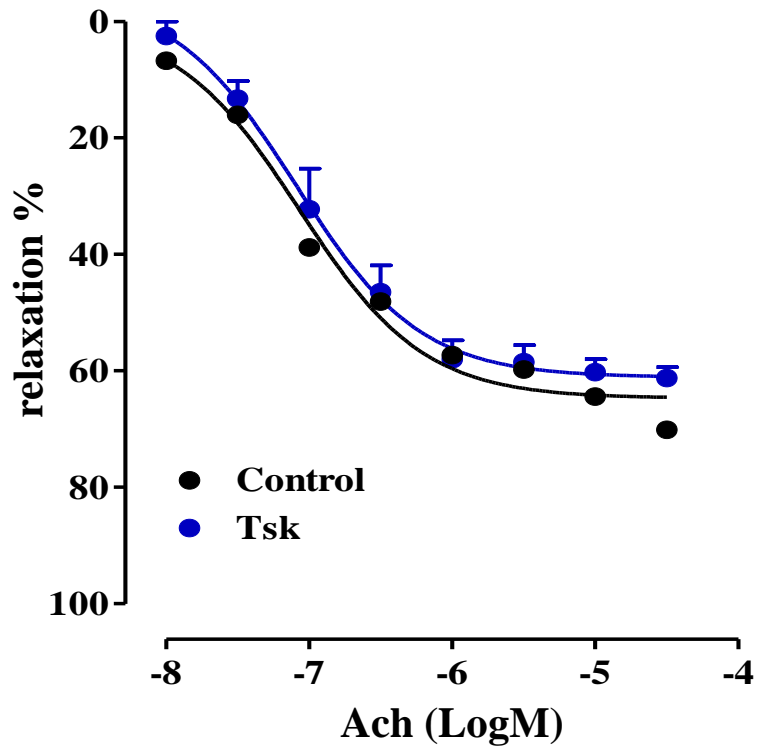

**Supplemental figure 2**

Concentration-response curve by Ach in aorta collected from 8-month old Tsk mice and compared with aorta from control animals. Data are shown as mean±SEM of % of relaxation vs Ach concentration.
